# Supplementary material for: Shape- and size-controlled synthesis of Cu nanoparticles wrapped on RGO nanosheet catalyst and their outstanding stability and catalytic performance in the hydrogenation reaction of dimethyl oxalate
Source: Royal Society of Chemistry journal article supplement (doi:10.1039/c8ta07371f), 2018-01-01
Supplement: c8ta07371f1.pdf [file c8ta07371f1.pdf]

**Supporting information**

**Shape and size controlled synthesis of Cu nanoparticles-wrapped on RGO nanosheet catalyst and their outstanding stability and catalytic performance in the hydrogenation reaction of dimethyl oxalate**

Mohamed Abbas<sup>a,b</sup>, Zheng Chen<sup>a,c</sup>, Jiangang Chen<sup>a,\*</sup>

---

<sup>a</sup> State Key Laboratory of Coal Conversion, Institute of Coal Chemistry, Chinese Academy of Sciences, Taiyuan, 030001, China.

<sup>b</sup> Ceramics Department, National Research Centre, El-Bohouth Str., 12622 Cairo, Egypt.

<sup>c</sup> University of Chinese Academy of Sciences, Beijing, China.

E-mail: mohamed\_abbas83@yahoo.com, mohamed@dgist.ac.kr, chenjg@sxicc.ac.cn

### **Synthesis of GO NSs using modified Hummer method**

Modified Hummers method was utilized to synthesize graphene oxide from the oxidation of high purity graphite powder. 96.0 ml Conc  $\text{H}_2\text{SO}_4$  was added gradually to a mixture of 2 gm purified graphite flakes and 1 gm of sodium nitrate with keeping in ice bath. After around 30 min of vigorous magnetic stirring, 6 gm of  $\text{KMnO}_4$  was added gradually and very carefully and stirred for 2 h under 20 °C as maintained by using ice bath. The mixture was placed in an oil bath whose temperature was maintained around 35 °C by a hot plate and magnetically stirred for 20 h after which the mixture turned into heavy brownish pasty color. Then, 150 ml di- water was added gradually within vigorous stirring. When the temperature increased with huge toxic gas bubbling, the more di-water was added until the solution diluted with 240 ml. When the diluted suspension color changed into brilliant yellow, 5 ml of  $\text{H}_2\text{O}_2$  as strong oxidizing agent was added to it. After 2 h of continuous stirring, the mixture was filtered and washed by rinsing and centrifugation with mixture of 10% HCl. Then ultra-pure ethanol and di-water was added for several times to increase the pH value towards neutral. The resulting filtered mixture was dried in oven for 24 h approximately at temperature 70 °C, and finally, solid GO powder was obtained.

**Table S1** Physico-chemical properties of the prepared catalysts

| Type of Catalyst               | S <sub>BET</sub> (m <sup>2</sup> /g) | Pore diameter (nm) | Cu <sup>+</sup> /(Cu <sup>+</sup> +Cu <sup>0</sup> ) % | TOF value (h <sup>-1</sup> ) |
|--------------------------------|--------------------------------------|--------------------|--------------------------------------------------------|------------------------------|
| Cu/RGO (US)                    | 43.8                                 | 8.1                | 27                                                     | 4.8                          |
| Cu/RGO (NH <sub>4</sub> OH)    | 21.9                                 | 7.3                | 28.3                                                   | 15.3                         |
| Cu/RGO (US/NH <sub>4</sub> OH) | 37.4                                 | 18.4               | 34                                                     | 17.1                         |
| Cu/RGO (10 wt%)                | 49.6                                 | 8.2                | 26.3                                                   | 12.6                         |
| Cu/RGO (25 wt%)                | 37.4                                 | 18.4               | 34                                                     | 17.1                         |
| Cu/RGO (45 wt%)                | 37                                   | 19.1               | 26                                                     | 14                           |

**Table S2** Reaction condition for the catalysts used in the comparison of the catalytic activity (Related to Table. 1)

| <b>Ref</b> | <b>Reaction temperature (°C)</b> | <b>H<sub>2</sub>/DMO Ratio mol mol<sup>-1</sup></b> |
|------------|----------------------------------|-----------------------------------------------------|
| 1          | 200                              | 80                                                  |
| 4          | 210                              | 300                                                 |
| 12         | 80                               | 17.5                                                |
| 13         | 220                              | 110                                                 |
| 32         | 220                              | 80                                                  |
| 38         | 180                              | 150                                                 |
| 39         | 210                              | 200                                                 |
| This work  | 210                              | 200                                                 |

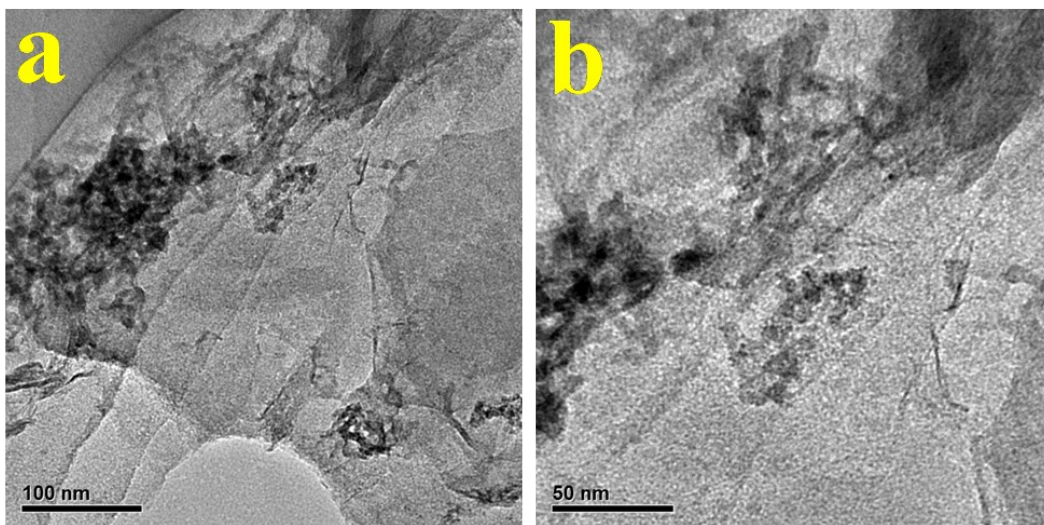

Fig. S1 TEM images for the Cu/RGO catalyst (US)

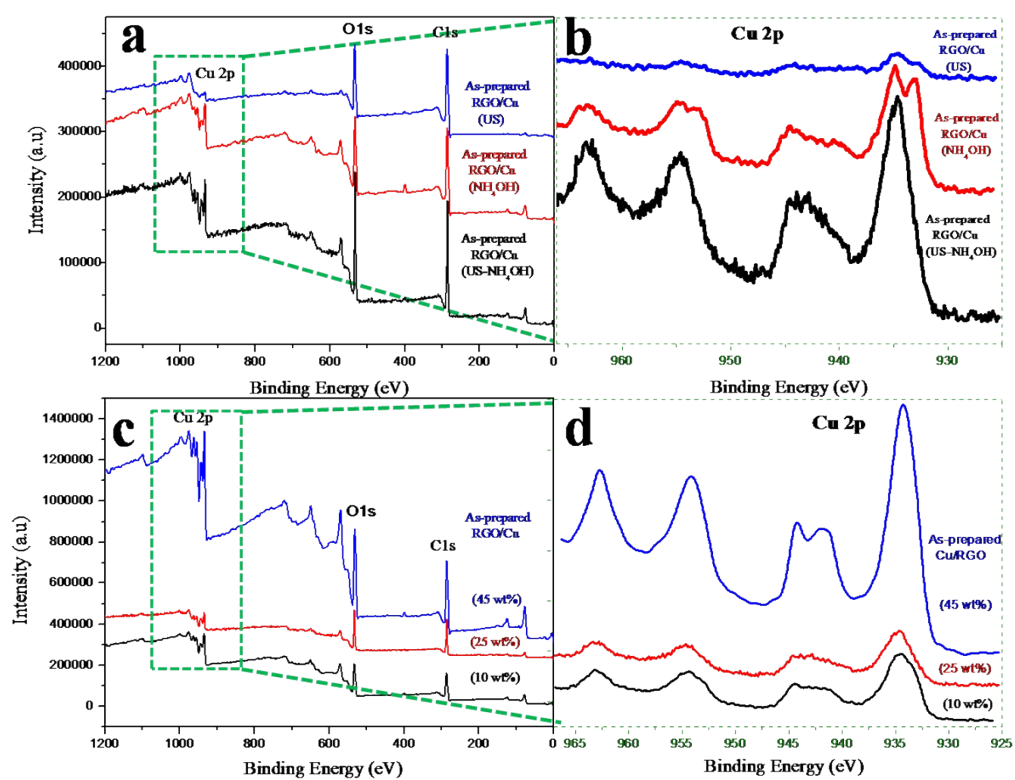

Fig. S2 XPS survey and analogous high resolution images of Cu 2p for Cu/RGO catalysts (a,b) synthesized in different reaction condition and (b) synthesized in presence of ultrasound and ammonia within different Cu wt% loading.

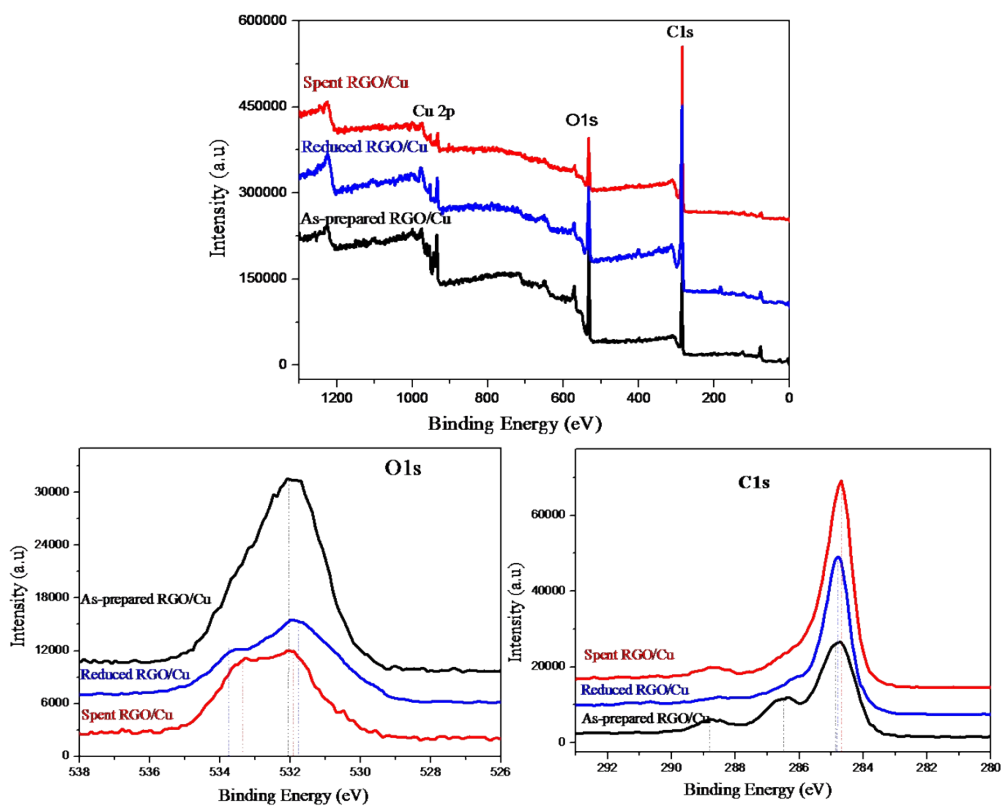

Fig. S3 XPS and HR-XPS to as-prepared, reduced and spent Cu/RGO catalyst to show the shift in the bending Energy values after reducing and used catalyst.

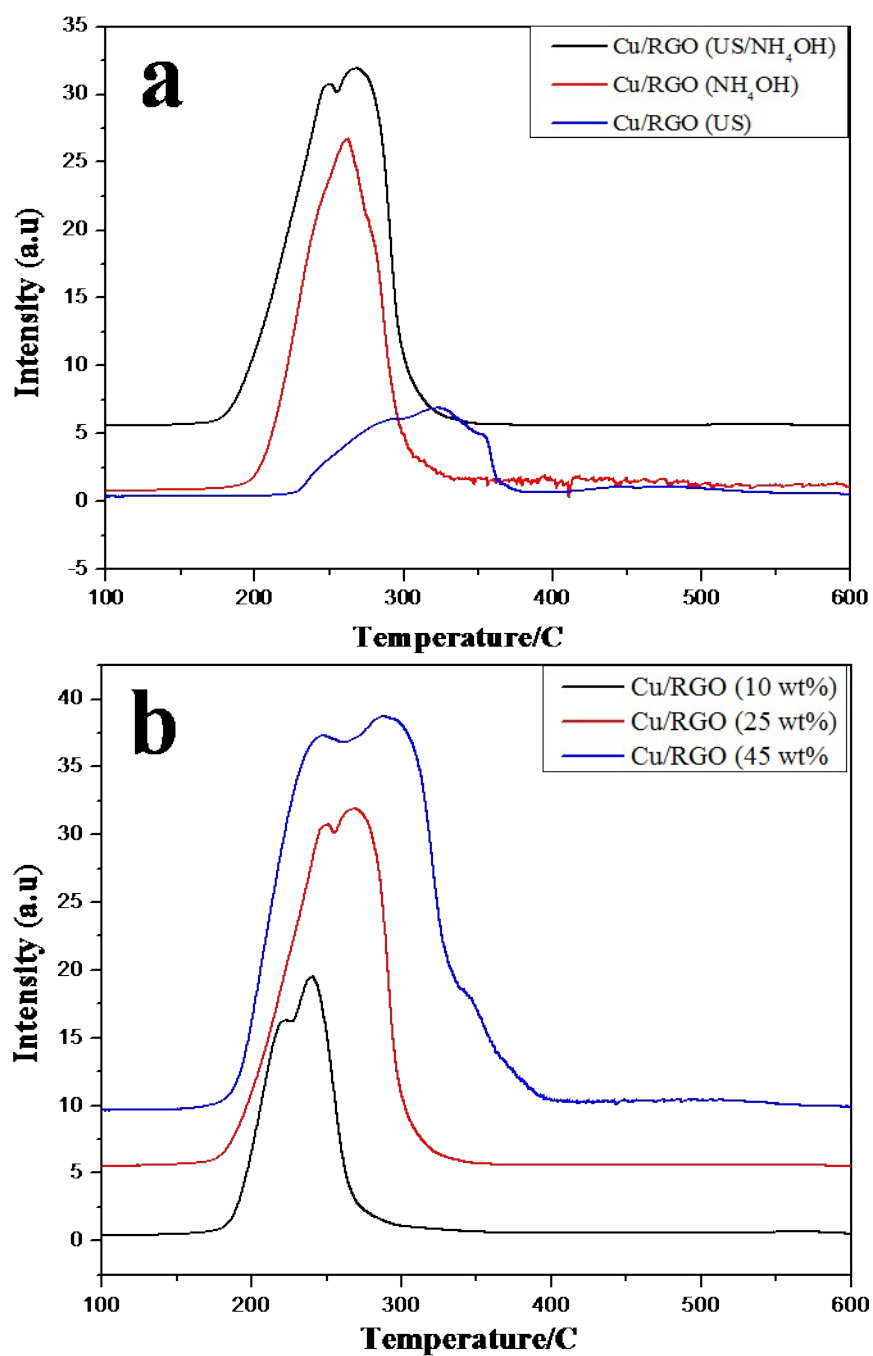

Fig. S4 H<sub>2</sub>-TPR for Cu/RGO catalysts synthesized (a) in different reaction condition and (b) synthesized in presence of ultrasound and ammonia within different Cu wt% loading.



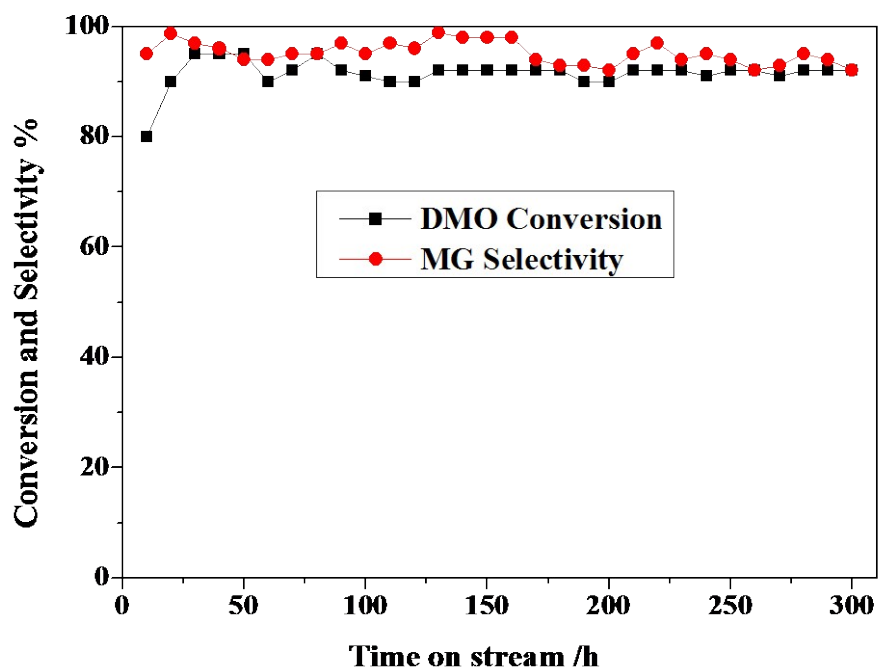

Fig. S5 MG and DMO conversion ratio for the spent Cu/RGO catalyst after 300 h of reaction time.

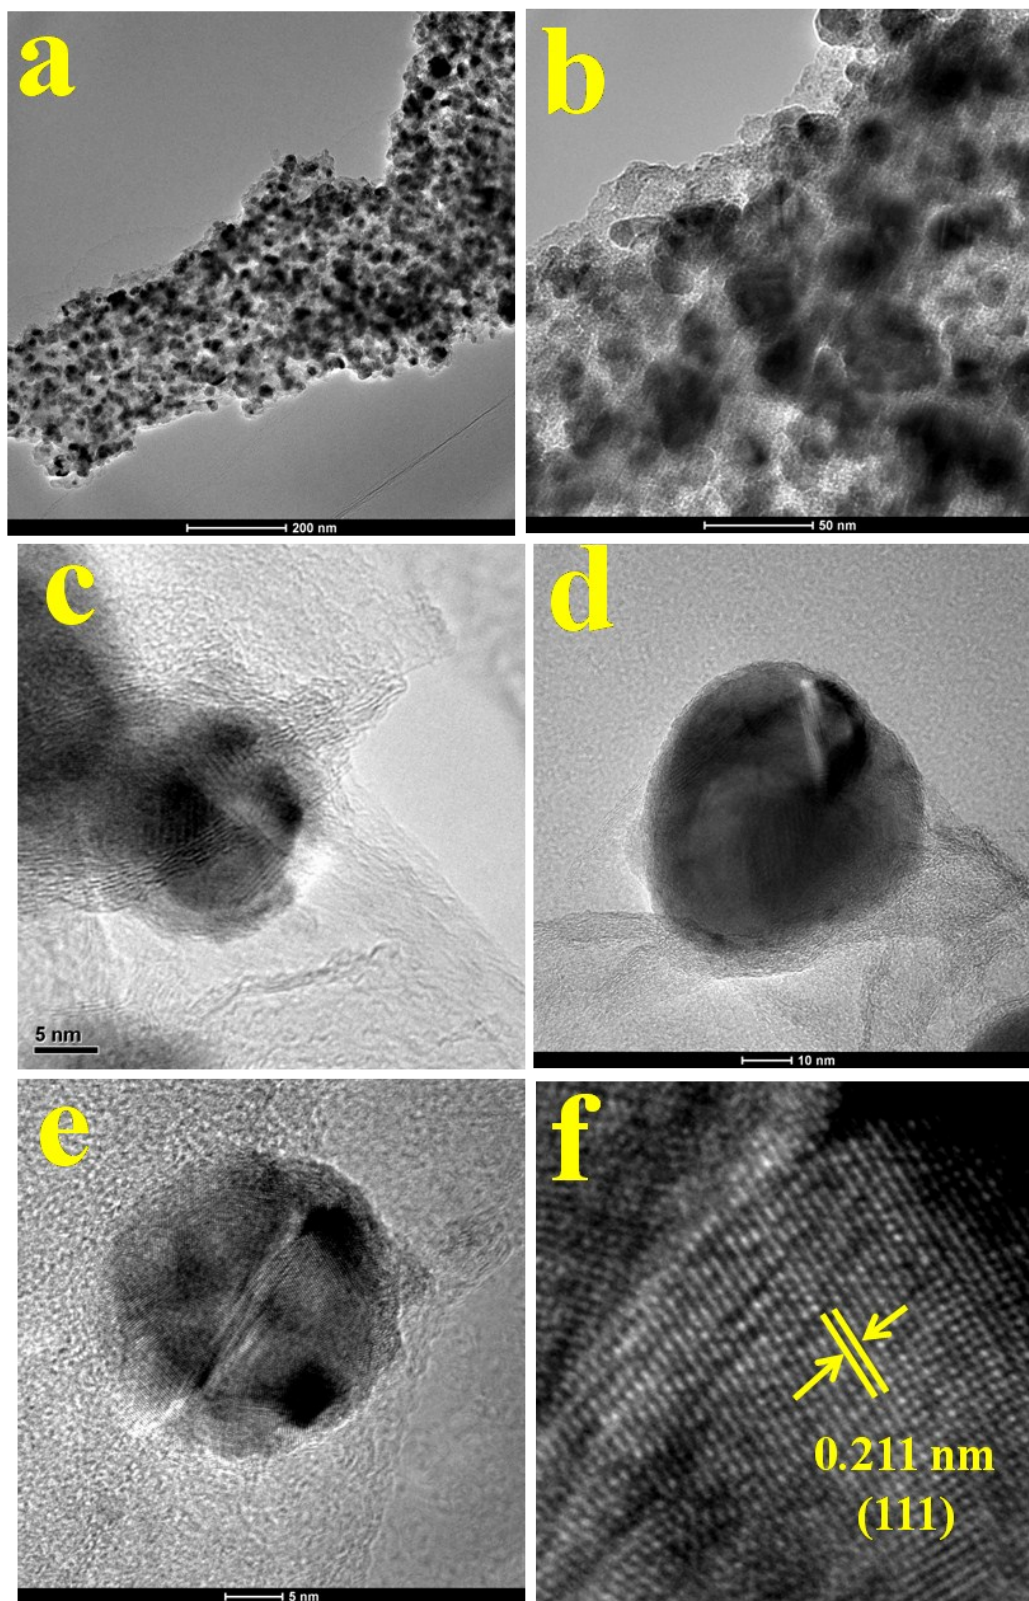

Fig. S6 TEM and HRTEM image for the spent Cu/RGO catalyst
